# Supplementary material for: Gamma-Tocotrienol Protects the Intestine from Radiation Potentially by Accelerating Mesenchymal Immune Cell Recovery
Source: PubMed Central journal article supplement (PMC6466604; doi:10.3390/antiox8030057), 2019-03-06
Supplement: antioxidants-08-00057-s001.pdf [file antioxidants-08-00057-s001.pdf]

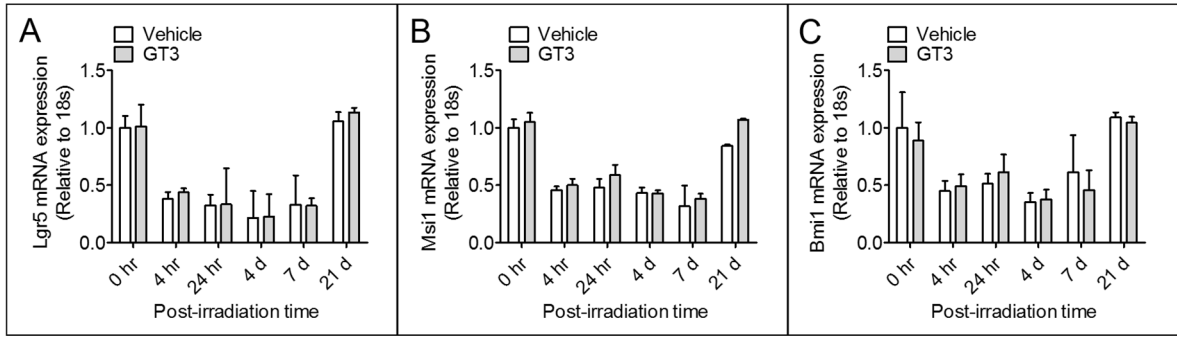

**Figure S1.** Effects of GT3 pretreatment on TBI-induced intestinal stem cell markers.
